# Supplementary material for: Stress-free single-cell transcriptomic profiling and functional genomics of murine eosinophils
Source: Springer Nature journal article supplement (doi:10.1038/s41596-024-00967-3), 2024-03-19
Supplement: MOESM3 [file 41596_2024_967_MOESM3_ESM13.xlsx]

## Sheet: DE-ARGON-P5 
Sequence Name	Sequence
pLG1_DE_P5 ARGON #1	AATGATACGGCGACCACCGAGATCTACACTCTTTCCCTACACGACGCTCTTCCGATCTCCCTTGGAGAACCACCT*T*G*T*T*G
pLG1_DE_P5 ARGON #2	AATGATACGGCGACCACCGAGATCTACACTCTTTCCCTACACGACGCTCTTCCGATCTCCCCTTGGAGAACCACCT*T*G*T*T*G
pLG1_DE_P5 ARGON #3	AATGATACGGCGACCACCGAGATCTACACTCTTTCCCTACACGACGCTCTTCCGATCTGCCCCTTGGAGAACCACCT*T*G*T*T*G
pLG1_DE_P5 ARGON #4	AATGATACGGCGACCACCGAGATCTACACTCTTTCCCTACACGACGCTCTTCCGATCTAGCCCCTTGGAGAACCACCT*T*G*T*T*G
pLG1_DE_P5 ARGON #5	AATGATACGGCGACCACCGAGATCTACACTCTTTCCCTACACGACGCTCTTCCGATCTCAACCCCTTGGAGAACCACCT*T*G*T*T*G
pLG1_DE_P5 ARGON #6	AATGATACGGCGACCACCGAGATCTACACTCTTTCCCTACACGACGCTCTTCCGATCTTGCACCCCCTTGGAGAACCACCT*T*G*T*T*G
pLG1_DE_P5 ARGON #7	AATGATACGGCGACCACCGAGATCTACACTCTTTCCCTACACGACGCTCTTCCGATCTACGCAACCCCTTGGAGAACCACCT*T*G*T*T*G
pLG1_DE_P5 ARGON #8	AATGATACGGCGACCACCGAGATCTACACTCTTTCCCTACACGACGCTCTTCCGATCTGAAGACCCCCCTTGGAGAACCACCT*T*G*T*T*G

## Sheet: DE-KERMIT-P7
Sequence Name	Sequence
pLG1_DE_P7_2_TTGAACCG	CAA GCA GAA GAC GGC ATA CGA GAT CGG TTC AAG TGA CTG GAG TTC AGA CGT GTG CTC TTC CGA TCT TGC ATG GCG GTA ATA CGG TT*A* T*C*C
pLG1_DE_P7_2_AATCCAGC	CAA GCA GAA GAC GGC ATA CGA GAT GCT GGA TTG TGA CTG GAG TTC AGA CGT GTG CTC TTC CGA TCT TGC ATG GCG GTA ATA CGG TT*A* T*C*C
pLG1_DE_P7_2_CCGAGTTA	CAA GCA GAA GAC GGC ATA CGA GAT TAA CTC GGG TGA CTG GAG TTC AGA CGT GTG CTC TTC CGA TCT TGC ATG GCG GTA ATA CGG TT*A* T*C*C
pLG1_DE_P7_2_AACTGTTA	CAA GCA GAA GAC GGC ATA CGA GAT TAA CAG TTG TGA CTG GAG TTC AGA CGT GTG CTC TTC CGA TCT TGC ATG GCG GTA ATA CGG TT*A* T*C*C
pLG1_DE_P7_2_TTGAGTAT	CAA GCA GAA GAC GGC ATA CGA GAT ATA CTC AAG TGA CTG GAG TTC AGA CGT GTG CTC TTC CGA TCT TGC ATG GCG GTA ATA CGG TT*A* T*C*C
pLG1_DE_P7_2_TTCTCAGC	CAA GCA GAA GAC GGC ATA CGA GAT GCT GAG AAG TGA CTG GAG TTC AGA CGT GTG CTC TTC CGA TCT TGC ATG GCG GTA ATA CGG TT*A* T*C*C
pLG1_DE_P7_2_CCTCCAAT	CAA GCA GAA GAC GGC ATA CGA GAT ATT GGA GGG TGA CTG GAG TTC AGA CGT GTG CTC TTC CGA TCT TGC ATG GCG GTA ATA CGG TT*A* T*C*C
pLG1_DE_P7_2_TTAGACTA	CAA GCA GAA GAC GGC ATA CGA GAT TAG TCT AAG TGA CTG GAG TTC AGA CGT GTG CTC TTC CGA TCT TGC ATG GCG GTA ATA CGG TT*A* T*C*C
pLG1_DE_P7_2_GGTCACCG	CAA GCA GAA GAC GGC ATA CGA GAT CGG TGA CCG TGA CTG GAG TTC AGA CGT GTG CTC TTC CGA TCT TGC ATG GCG GTA ATA CGG TT*A* T*C*C
pLG1_DE_P7_2_CCTCTGTA	CAA GCA GAA GAC GGC ATA CGA GAT TAC AGA GGG TGA CTG GAG TTC AGA CGT GTG CTC TTC CGA TCT TGC ATG GCG GTA ATA CGG TT*A* T*C*C
pLG1_DE_P7_2_TTGACAAT	CAA GCA GAA GAC GGC ATA CGA GAT ATT GTC AAG TGA CTG GAG TTC AGA CGT GTG CTC TTC CGA TCT TGC ATG GCG GTA ATA CGG TT*A* T*C*C
pLG1_DE_P7_2_AAGACATA	CAA GCA GAA GAC GGC ATA CGA GAT TAT GTC TTG TGA CTG GAG TTC AGA CGT GTG CTC TTC CGA TCT TGC ATG GCG GTA ATA CGG TT*A* T*C*C
pLG1_DE_P7_2_AATCCAAT	CAA GCA GAA GAC GGC ATA CGA GAT ATT GGA TTG TGA CTG GAG TTC AGA CGT GTG CTC TTC CGA TCT TGC ATG GCG GTA ATA CGG TT*A* T*C*C
pLG1_DE_P7_2_CCGAGTAT	CAA GCA GAA GAC GGC ATA CGA GAT ATA CTC GGG TGA CTG GAG TTC AGA CGT GTG CTC TTC CGA TCT TGC ATG GCG GTA ATA CGG TT*A* T*C*C
pLG1_DE_P7_2_TTCTCATA	CAA GCA GAA GAC GGC ATA CGA GAT TAT GAG AAG TGA CTG GAG TTC AGA CGT GTG CTC TTC CGA TCT TGC ATG GCG GTA ATA CGG TT*A* T*C*C
pLG1_DE_P7_2_AACTGTGC	CAA GCA GAA GAC GGC ATA CGA GAT GCA CAG TTG TGA CTG GAG TTC AGA CGT GTG CTC TTC CGA TCT TGC ATG GCG GTA ATA CGG TT*A* T*C*C
pLG1_DE_P7_2_AATCCACG	CAA GCA GAA GAC GGC ATA CGA GAT CGT GGA TTG TGA CTG GAG TTC AGA CGT GTG CTC TTC CGA TCT TGC ATG GCG GTA ATA CGG TT*A* T*C*C
pLG1_DE_P7_2_TTCTACTA	CAA GCA GAA GAC GGC ATA CGA GAT TAG TAG AAG TGA CTG GAG TTC AGA CGT GTG CTC TTC CGA TCT TGC ATG GCG GTA ATA CGG TT*A* T*C*C
pLG1_DE_P7_2_AATCGTGC	CAA GCA GAA GAC GGC ATA CGA GAT GCA CGA TTG TGA CTG GAG TTC AGA CGT GTG CTC TTC CGA TCT TGC ATG GCG GTA ATA CGG TT*A* T*C*C
pLG1_DE_P7_2_GGCTACCG	CAA GCA GAA GAC GGC ATA CGA GAT CGG TAG CCG TGA CTG GAG TTC AGA CGT GTG CTC TTC CGA TCT TGC ATG GCG GTA ATA CGG TT*A* T*C*C
pLG1_DE_P7_2_AAGAACTA	CAA GCA GAA GAC GGC ATA CGA GAT TAG TTC TTG TGA CTG GAG TTC AGA CGT GTG CTC TTC CGA TCT TGC ATG GCG GTA ATA CGG TT*A* T*C*C
pLG1_DE_P7_2_AACTTGTA	CAA GCA GAA GAC GGC ATA CGA GAT TAC AAG TTG TGA CTG GAG TTC AGA CGT GTG CTC TTC CGA TCT TGC ATG GCG GTA ATA CGG TT*A* T*C*C
pLG1_DE_P7_2_CCAGTGAT	CAA GCA GAA GAC GGC ATA CGA GAT ATC ACT GGG TGA CTG GAG TTC AGA CGT GTG CTC TTC CGA TCT TGC ATG GCG GTA ATA CGG TT*A* T*C*C
pLG1_DE_P7_2_TTGATGCG	CAA GCA GAA GAC GGC ATA CGA GAT CGC ATC AAG TGA CTG GAG TTC AGA CGT GTG CTC TTC CGA TCT TGC ATG GCG GTA ATA CGG TT*A* T*C*C
pLG1_DE_P7_2_GGTCGTGC	CAA GCA GAA GAC GGC ATA CGA GAT GCA CGA CCG TGA CTG GAG TTC AGA CGT GTG CTC TTC CGA TCT TGC ATG GCG GTA ATA CGG TT*A* T*C*C
pLG1_DE_P7_2_GGAGTGTA	CAA GCA GAA GAC GGC ATA CGA GAT TAC ACT CCG TGA CTG GAG TTC AGA CGT GTG CTC TTC CGA TCT TGC ATG GCG GTA ATA CGG TT*A* T*C*C
pLG1_DE_P7_2_TTAGACCG	CAA GCA GAA GAC GGC ATA CGA GAT CGG TCT AAG TGA CTG GAG TTC AGA CGT GTG CTC TTC CGA TCT TGC ATG GCG GTA ATA CGG TT*A* T*C*C
pLG1_DE_P7_2_CCGAACAT	CAA GCA GAA GAC GGC ATA CGA GAT ATG TTC GGG TGA CTG GAG TTC AGA CGT GTG CTC TTC CGA TCT TGC ATG GCG GTA ATA CGG TT*A* T*C*C
pLG1_DE_P7_2_GGTCCACG	CAA GCA GAA GAC GGC ATA CGA GAT CGT GGA CCG TGA CTG GAG TTC AGA CGT GTG CTC TTC CGA TCT TGC ATG GCG GTA ATA CGG TT*A* T*C*C
pLG1_DE_P7_2_GGCTCAAT	CAA GCA GAA GAC GGC ATA CGA GAT ATT GAG CCG TGA CTG GAG TTC AGA CGT GTG CTC TTC CGA TCT TGC ATG GCG GTA ATA CGG TT*A* T*C*C
pLG1_DE_P7_2_CCGAACTA	CAA GCA GAA GAC GGC ATA CGA GAT TAG TTC GGG TGA CTG GAG TTC AGA CGT GTG CTC TTC CGA TCT TGC ATG GCG GTA ATA CGG TT*A* T*C*C
pLG1_DE_P7_2_CCTCACCG	CAA GCA GAA GAC GGC ATA CGA GAT CGG TGA GGG TGA CTG GAG TTC AGA CGT GTG CTC TTC CGA TCT TGC ATG GCG GTA ATA CGG TT*A* T*C*C
pLG1_DE_P7_2_AACTCACG	CAA GCA GAA GAC GGC ATA CGA GAT CGT GAG TTG TGA CTG GAG TTC AGA CGT GTG CTC TTC CGA TCT TGC ATG GCG GTA ATA CGG TT*A* T*C*C
pLG1_DE_P7_2_AATCTGAT	CAA GCA GAA GAC GGC ATA CGA GAT ATC AGA TTG TGA CTG GAG TTC AGA CGT GTG CTC TTC CGA TCT TGC ATG GCG GTA ATA CGG TT*A* T*C*C
pLG1_DE_P7_2_AATCACTA	CAA GCA GAA GAC GGC ATA CGA GAT TAG TGA TTG TGA CTG GAG TTC AGA CGT GTG CTC TTC CGA TCT TGC ATG GCG GTA ATA CGG TT*A* T*C*C
pLG1_DE_P7_2_CCGAACCG	CAA GCA GAA GAC GGC ATA CGA GAT CGG TTC GGG TGA CTG GAG TTC AGA CGT GTG CTC TTC CGA TCT TGC ATG GCG GTA ATA CGG TT*A* T*C*C
pLG1_DE_P7_2_GGTCCATA	CAA GCA GAA GAC GGC ATA CGA GAT TAT GGA CCG TGA CTG GAG TTC AGA CGT GTG CTC TTC CGA TCT TGC ATG GCG GTA ATA CGG TT*A* T*C*C
pLG1_DE_P7_2_AACTTGGC	CAA GCA GAA GAC GGC ATA CGA GAT GCC AAG TTG TGA CTG GAG TTC AGA CGT GTG CTC TTC CGA TCT TGC ATG GCG GTA ATA CGG TT*A* T*C*C
pLG1_DE_P7_2_GGTCTGCG	CAA GCA GAA GAC GGC ATA CGA GAT CGC AGA CCG TGA CTG GAG TTC AGA CGT GTG CTC TTC CGA TCT TGC ATG GCG GTA ATA CGG TT*A* T*C*C
pLG1_DE_P7_2_GGAGGTCG	CAA GCA GAA GAC GGC ATA CGA GAT CGA CCT CCG TGA CTG GAG TTC AGA CGT GTG CTC TTC CGA TCT TGC ATG GCG GTA ATA CGG TT*A* T*C*C
pLG1_DE_P7_2_CCAGTGGC	CAA GCA GAA GAC GGC ATA CGA GAT GCC ACT GGG TGA CTG GAG TTC AGA CGT GTG CTC TTC CGA TCT TGC ATG GCG GTA ATA CGG TT*A* T*C*C
pLG1_DE_P7_2_AACTACGC	CAA GCA GAA GAC GGC ATA CGA GAT GCG TAG TTG TGA CTG GAG TTC AGA CGT GTG CTC TTC CGA TCT TGC ATG GCG GTA ATA CGG TT*A* T*C*C
pLG1_DE_P7_2_AACTTGCG	CAA GCA GAA GAC GGC ATA CGA GAT CGC AAG TTG TGA CTG GAG TTC AGA CGT GTG CTC TTC CGA TCT TGC ATG GCG GTA ATA CGG TT*A* T*C*C
pLG1_DE_P7_2_AACTGTCG	CAA GCA GAA GAC GGC ATA CGA GAT CGA CAG TTG TGA CTG GAG TTC AGA CGT GTG CTC TTC CGA TCT TGC ATG GCG GTA ATA CGG TT*A* T*C*C
pLG1_DE_P7_2_AAGATGCG	CAA GCA GAA GAC GGC ATA CGA GAT CGC ATC TTG TGA CTG GAG TTC AGA CGT GTG CTC TTC CGA TCT TGC ATG GCG GTA ATA CGG TT*A* T*C*C
pLG1_DE_P7_2_TTGAACAT	CAA GCA GAA GAC GGC ATA CGA GAT ATG TTC AAG TGA CTG GAG TTC AGA CGT GTG CTC TTC CGA TCT TGC ATG GCG GTA ATA CGG TT*A* T*C*C
pLG1_DE_P7_2_TTCTACGC	CAA GCA GAA GAC GGC ATA CGA GAT GCG TAG AAG TGA CTG GAG TTC AGA CGT GTG CTC TTC CGA TCT TGC ATG GCG GTA ATA CGG TT*A* T*C*C
pLG1_DE_P7_2_GGCTACAT	CAA GCA GAA GAC GGC ATA CGA GAT ATG TAG CCG TGA CTG GAG TTC AGA CGT GTG CTC TTC CGA TCT TGC ATG GCG GTA ATA CGG TT*A* T*C*C
pLG1_DE_P7_2_TTGAGTTA	CAA GCA GAA GAC GGC ATA CGA GAT TAA CTC AAG TGA CTG GAG TTC AGA CGT GTG CTC TTC CGA TCT TGC ATG GCG GTA ATA CGG TT*A* T*C*C
pLG1_DE_P7_2_GGCTCACG	CAA GCA GAA GAC GGC ATA CGA GAT CGT GAG CCG TGA CTG GAG TTC AGA CGT GTG CTC TTC CGA TCT TGC ATG GCG GTA ATA CGG TT*A* T*C*C
pLG1_DE_P7_2_CCTCTGAT	CAA GCA GAA GAC GGC ATA CGA GAT ATC AGA GGG TGA CTG GAG TTC AGA CGT GTG CTC TTC CGA TCT TGC ATG GCG GTA ATA CGG TT*A* T*C*C
pLG1_DE_P7_2_CCTCCATA	CAA GCA GAA GAC GGC ATA CGA GAT TAT GGA GGG TGA CTG GAG TTC AGA CGT GTG CTC TTC CGA TCT TGC ATG GCG GTA ATA CGG TT*A* T*C*C
pLG1_DE_P7_2_TTGAACGC	CAA GCA GAA GAC GGC ATA CGA GAT GCG TTC AAG TGA CTG GAG TTC AGA CGT GTG CTC TTC CGA TCT TGC ATG GCG GTA ATA CGG TT*A* T*C*C
pLG1_DE_P7_2_TTCTTGCG	CAA GCA GAA GAC GGC ATA CGA GAT CGC AAG AAG TGA CTG GAG TTC AGA CGT GTG CTC TTC CGA TCT TGC ATG GCG GTA ATA CGG TT*A* T*C*C
pLG1_DE_P7_2_GGCTGTCG	CAA GCA GAA GAC GGC ATA CGA GAT CGA CAG CCG TGA CTG GAG TTC AGA CGT GTG CTC TTC CGA TCT TGC ATG GCG GTA ATA CGG TT*A* T*C*C
pLG1_DE_P7_2_CCGAGTCG	CAA GCA GAA GAC GGC ATA CGA GAT CGA CTC GGG TGA CTG GAG TTC AGA CGT GTG CTC TTC CGA TCT TGC ATG GCG GTA ATA CGG TT*A* T*C*C
pLG1_DE_P7_2_TTCTTGTA	CAA GCA GAA GAC GGC ATA CGA GAT TAC AAG AAG TGA CTG GAG TTC AGA CGT GTG CTC TTC CGA TCT TGC ATG GCG GTA ATA CGG TT*A* T*C*C
pLG1_DE_P7_2_AATCTGCG	CAA GCA GAA GAC GGC ATA CGA GAT CGC AGA TTG TGA CTG GAG TTC AGA CGT GTG CTC TTC CGA TCT TGC ATG GCG GTA ATA CGG TT*A* T*C*C
pLG1_DE_P7_2_GGAGCAAT	CAA GCA GAA GAC GGC ATA CGA GAT ATT GCT CCG TGA CTG GAG TTC AGA CGT GTG CTC TTC CGA TCT TGC ATG GCG GTA ATA CGG TT*A* T*C*C
pLG1_DE_P7_2_CCGAGTGC	CAA GCA GAA GAC GGC ATA CGA GAT GCA CTC GGG TGA CTG GAG TTC AGA CGT GTG CTC TTC CGA TCT TGC ATG GCG GTA ATA CGG TT*A* T*C*C
pLG1_DE_P7_2_AAGAACAT	CAA GCA GAA GAC GGC ATA CGA GAT ATG TTC TTG TGA CTG GAG TTC AGA CGT GTG CTC TTC CGA TCT TGC ATG GCG GTA ATA CGG TT*A* T*C*C
pLG1_DE_P7_2_GGAGACAT	CAA GCA GAA GAC GGC ATA CGA GAT ATG TCT CCG TGA CTG GAG TTC AGA CGT GTG CTC TTC CGA TCT TGC ATG GCG GTA ATA CGG TT*A* T*C*C
pLG1_DE_P7_2_TTGAGTGC	CAA GCA GAA GAC GGC ATA CGA GAT GCA CTC AAG TGA CTG GAG TTC AGA CGT GTG CTC TTC CGA TCT TGC ATG GCG GTA ATA CGG TT*A* T*C*C
pLG1_DE_P7_2_GGCTACTA	CAA GCA GAA GAC GGC ATA CGA GAT TAG TAG CCG TGA CTG GAG TTC AGA CGT GTG CTC TTC CGA TCT TGC ATG GCG GTA ATA CGG TT*A* T*C*C
pLG1_DE_P7_2_TTGACACG	CAA GCA GAA GAC GGC ATA CGA GAT CGT GTC AAG TGA CTG GAG TTC AGA CGT GTG CTC TTC CGA TCT TGC ATG GCG GTA ATA CGG TT*A* T*C*C
pLG1_DE_P7_2_AAGAACGC	CAA GCA GAA GAC GGC ATA CGA GAT GCG TTC TTG TGA CTG GAG TTC AGA CGT GTG CTC TTC CGA TCT TGC ATG GCG GTA ATA CGG TT*A* T*C*C
pLG1_DE_P7_2_GGCTTGGC	CAA GCA GAA GAC GGC ATA CGA GAT GCC AAG CCG TGA CTG GAG TTC AGA CGT GTG CTC TTC CGA TCT TGC ATG GCG GTA ATA CGG TT*A* T*C*C
pLG1_DE_P7_2_GGAGGTGC	CAA GCA GAA GAC GGC ATA CGA GAT GCA CCT CCG TGA CTG GAG TTC AGA CGT GTG CTC TTC CGA TCT TGC ATG GCG GTA ATA CGG TT*A* T*C*C
pLG1_DE_P7_2_CCAGGTGC	CAA GCA GAA GAC GGC ATA CGA GAT GCA CCT GGG TGA CTG GAG TTC AGA CGT GTG CTC TTC CGA TCT TGC ATG GCG GTA ATA CGG TT*A* T*C*C
pLG1_DE_P7_2_GGTCTGGC	CAA GCA GAA GAC GGC ATA CGA GAT GCC AGA CCG TGA CTG GAG TTC AGA CGT GTG CTC TTC CGA TCT TGC ATG GCG GTA ATA CGG TT*A* T*C*C
pLG1_DE_P7_2_GGCTTGCG	CAA GCA GAA GAC GGC ATA CGA GAT CGC AAG CCG TGA CTG GAG TTC AGA CGT GTG CTC TTC CGA TCT TGC ATG GCG GTA ATA CGG TT*A* T*C*C
pLG1_DE_P7_2_TTGATGTA	CAA GCA GAA GAC GGC ATA CGA GAT TAC ATC AAG TGA CTG GAG TTC AGA CGT GTG CTC TTC CGA TCT TGC ATG GCG GTA ATA CGG TT*A* T*C*C
pLG1_DE_P7_2_GGCTACGC	CAA GCA GAA GAC GGC ATA CGA GAT GCG TAG CCG TGA CTG GAG TTC AGA CGT GTG CTC TTC CGA TCT TGC ATG GCG GTA ATA CGG TT*A* T*C*C
pLG1_DE_P7_2_TTCTGTCG	CAA GCA GAA GAC GGC ATA CGA GAT CGA CAG AAG TGA CTG GAG TTC AGA CGT GTG CTC TTC CGA TCT TGC ATG GCG GTA ATA CGG TT*A* T*C*C
pLG1_DE_P7_2_CCAGACTA	CAA GCA GAA GAC GGC ATA CGA GAT TAG TCT GGG TGA CTG GAG TTC AGA CGT GTG CTC TTC CGA TCT TGC ATG GCG GTA ATA CGG TT*A* T*C*C
pLG1_DE_P7_2_AACTTGAT	CAA GCA GAA GAC GGC ATA CGA GAT ATC AAG TTG TGA CTG GAG TTC AGA CGT GTG CTC TTC CGA TCT TGC ATG GCG GTA ATA CGG TT*A* T*C*C
pLG1_DE_P7_2_AACTACTA	CAA GCA GAA GAC GGC ATA CGA GAT TAG TAG TTG TGA CTG GAG TTC AGA CGT GTG CTC TTC CGA TCT TGC ATG GCG GTA ATA CGG TT*A* T*C*C
pLG1_DE_P7_2_AAGAGTAT	CAA GCA GAA GAC GGC ATA CGA GAT ATA CTC TTG TGA CTG GAG TTC AGA CGT GTG CTC TTC CGA TCT TGC ATG GCG GTA ATA CGG TT*A* T*C*C
pLG1_DE_P7_2_AACTACCG	CAA GCA GAA GAC GGC ATA CGA GAT CGG TAG TTG TGA CTG GAG TTC AGA CGT GTG CTC TTC CGA TCT TGC ATG GCG GTA ATA CGG TT*A* T*C*C
pLG1_DE_P7_2_CCTCGTAT	CAA GCA GAA GAC GGC ATA CGA GAT ATA CGA GGG TGA CTG GAG TTC AGA CGT GTG CTC TTC CGA TCT TGC ATG GCG GTA ATA CGG TT*A* T*C*C
pLG1_DE_P7_2_CCAGTGCG	CAA GCA GAA GAC GGC ATA CGA GAT CGC ACT GGG TGA CTG GAG TTC AGA CGT GTG CTC TTC CGA TCT TGC ATG GCG GTA ATA CGG TT*A* T*C*C
pLG1_DE_P7_2_GGTCTGTA	CAA GCA GAA GAC GGC ATA CGA GAT TAC AGA CCG TGA CTG GAG TTC AGA CGT GTG CTC TTC CGA TCT TGC ATG GCG GTA ATA CGG TT*A* T*C*C
pLG1_DE_P7_2_GGTCACGC	CAA GCA GAA GAC GGC ATA CGA GAT GCG TGA CCG TGA CTG GAG TTC AGA CGT GTG CTC TTC CGA TCT TGC ATG GCG GTA ATA CGG TT*A* T*C*C
pLG1_DE_P7_2_CCGACATA	CAA GCA GAA GAC GGC ATA CGA GAT TAT GTC GGG TGA CTG GAG TTC AGA CGT GTG CTC TTC CGA TCT TGC ATG GCG GTA ATA CGG TT*A* T*C*C
pLG1_DE_P7_2_AAGAGTCG	CAA GCA GAA GAC GGC ATA CGA GAT CGA CTC TTG TGA CTG GAG TTC AGA CGT GTG CTC TTC CGA TCT TGC ATG GCG GTA ATA CGG TT*A* T*C*C
pLG1_DE_P7_2_CCGAACGC	CAA GCA GAA GAC GGC ATA CGA GAT GCG TTC GGG TGA CTG GAG TTC AGA CGT GTG CTC TTC CGA TCT TGC ATG GCG GTA ATA CGG TT*A* T*C*C
pLG1_DE_P7_2_TTAGGTAT	CAA GCA GAA GAC GGC ATA CGA GAT ATA CCT AAG TGA CTG GAG TTC AGA CGT GTG CTC TTC CGA TCT TGC ATG GCG GTA ATA CGG TT*A* T*C*C
pLG1_DE_P7_2_AATCACCG	CAA GCA GAA GAC GGC ATA CGA GAT CGG TGA TTG TGA CTG GAG TTC AGA CGT GTG CTC TTC CGA TCT TGC ATG GCG GTA ATA CGG TT*A* T*C*C
pLG1_DE_P7_2_GGTCGTTA	CAA GCA GAA GAC GGC ATA CGA GAT TAA CGA CCG TGA CTG GAG TTC AGA CGT GTG CTC TTC CGA TCT TGC ATG GCG GTA ATA CGG TT*A* T*C*C
pLG1_DE_P7_2_GGCTGTAT	CAA GCA GAA GAC GGC ATA CGA GAT ATA CAG CCG TGA CTG GAG TTC AGA CGT GTG CTC TTC CGA TCT TGC ATG GCG GTA ATA CGG TT*A* T*C*C
pLG1_DE_P7_2_GGTCGTCG	CAA GCA GAA GAC GGC ATA CGA GAT CGA CGA CCG TGA CTG GAG TTC AGA CGT GTG CTC TTC CGA TCT TGC ATG GCG GTA ATA CGG TT*A* T*C*C
pLG1_DE_P7_2_TTAGTGAT	CAA GCA GAA GAC GGC ATA CGA GAT ATC ACT AAG TGA CTG GAG TTC AGA CGT GTG CTC TTC CGA TCT TGC ATG GCG GTA ATA CGG TT*A* T*C*C
pLG1_DE_P7_2_CCAGGTCG	CAA GCA GAA GAC GGC ATA CGA GAT CGA CCT GGG TGA CTG GAG TTC AGA CGT GTG CTC TTC CGA TCT TGC ATG GCG GTA ATA CGG TT*A* T*C*C
pLG1_DE_P7_2_TTGACATA	CAA GCA GAA GAC GGC ATA CGA GAT TAT GTC AAG TGA CTG GAG TTC AGA CGT GTG CTC TTC CGA TCT TGC ATG GCG GTA ATA CGG TT*A* T*C*C
pLG1_DE_P7_2_TTAGGTTA	CAA GCA GAA GAC GGC ATA CGA GAT TAA CCT AAG TGA CTG GAG TTC AGA CGT GTG CTC TTC CGA TCT TGC ATG GCG GTA ATA CGG TT*A* T*C*C
pLG1_DE_P7_2_AAGATGGC	CAA GCA GAA GAC GGC ATA CGA GAT GCC ATC TTG TGA CTG GAG TTC AGA CGT GTG CTC TTC CGA TCT TGC ATG GCG GTA ATA CGG TT*A* T*C*C
